# Supplementary material for: A conserved function for pericentromeric satellite DNA
Source: eLife. 2018 Mar 26;7:e34122. doi: 10.7554/eLife.34122 (PMC5957525; doi:10.7554/eLife.34122)
Supplement: Figure 3—source data 1. — g-H2Ax foci were scored in siControl and siHMGA1 transfected MOVAs cells. At least 100 cells were scored from three biological replicates. Percentage of cells containing the indicated number of g-H2Ax foci is listed in the table. [file elife-34122-fig3-data1.xlsx]

## Sheet: Sheet1
	siControl (% cells with indicated g-H2Ax foci)				siHMGA1 (% cells with indicated g-H2Ax foci)
# g-H2Ax foci	Replicate 1 (102 cells)	Replicate 2 (101 cells)	Replicate 3 (101 cells)		Replicate 1 (104 cells)	Replicate 2 (101 cells)	Replicate 3 (104 cells)
0	52.9	55.5	38.6		29.8	35.6	34.6
1	14.7	20.8	15.8		12.5	12.9	6.7
2	10.8	3	6		8.7	10.9	10.6
3	4.9	6.9	5		12.5	3	3.8
4	5.9	5	5		1	4	8.7
5	0	0	4		1	1	2.9
6	0	0	4		1	4	2.9
7	1	0	7.9		0	0	3.8
8	1	1	2		0	2	5.8
9	0	0	1		0	0	1.9
>10	8.8	7.9	10.9		34.6	26.7	18.26
