# Supplementary material for: A conserved function for pericentromeric satellite DNA
Source: eLife. 2018 Mar 26;7:e34122. doi: 10.7554/eLife.34122 (PMC5957525; doi:10.7554/eLife.34122)
Supplement: Figure 5—source data 1. — Images of cells expressing GFP (n=27) or GFP-D1 (n=47) were acquired from a single slide/transfection with all image acquisition parameters held constant and care taken to avoid pixel oversaturation. Total GFP fluorescence per cell was quantified using ImageJ software. Relative expression was calculated by dividing each individual fluorescence value over the maximum fluorescence value obtained over the course of the experiment. DAPI staining was used to calculate number of chromocenters per cell. [file elife-34122-fig5-data1.xlsx]

## Sheet: Sheet1
GFP			GFP-D1
Relative Expression	# Chromocenters		Relative Expression	# Chromocenters
0.41	36		0.33	7
0.09	38		0.04	14
0.02	31		0.21	7
0.36	42		0.19	14
0.38	31		0.08	24
0.04	26		0.16	18
0.14	32		1	4
0.2	28		0.12	10
0.04	30		0.15	29
0.23	34		0.02	35
0.05	48		0.6	8
0.75	38		0.6	10
0.1	45		0.51	11
0.03	32		0.5	14
0.03	30		0.84	10
0.04	35		0.04	26
0.18	32		0.22	22
0.13	31		0.05	29
1	28		0.04	42
0.09	42		0.07	27
0.03	30		0.42	24
0.04	28		0.36	17
0.19	33		0.65	15
0.05	38		0.04	15
0.12	22		0.14	11
0.16	44		0.09	22
0.35	36		0.08	19
0.19	38		0.41	8
0.05	39		0.23	21
			0.38	10
			0.27	14
			0.03	34
			0.35	18
			0.06	30
			0.64	12
			0.24	24
			0.37	20
			0.4	21
			0.11	24
			0.11	34
			0.25	3
			0.1	23
			0.11	14
			0.43	9
			0.48	10
			0.3	42
			0.28	10
