# Supplementary material for: A conserved function for pericentromeric satellite DNA
Source: eLife. 2018 Mar 26;7:e34122. doi: 10.7554/eLife.34122 (PMC5957525; doi:10.7554/eLife.34122)
Supplement: Figure 5—source data 2. — LacO-AATAT distance (nm) was measured in spermatogonial cells expressing GFP-D1 (n=97) and GFP-LacI-D1 (n=69) using Leica LAS X software. [file elife-34122-fig5-data2.xlsx]

## Sheet: Sheet1
GFP-D1 (LacO-AATAT distance in nm)		GFP-LacI-D1 (LacO-AATAT distance in nm)
From 3 Replicates		From 3 Replicates
1540		0
3630		2700
2110		1500
2680		0
1890		516
2000		0
3530		3350
6740		658
4360		1700
4360		2930
923		3860
1130		5890
1560		860
1680		1220
2620		5130
0		0
0		3190
2390		0
2050		1350
4690		2960
5280		3310
0		1640
2470		0
3940		0
3130		0
3820		4180
5370		1650
0		1720
0		2080
1100		0
2180		1430
1710		0
2010		1250
4630		696
7360		2230
1680		1460
3430		4120
1850		0
5760		0
0		2000
565		2210
2280		1020
2800		0
2100		289
3780		0
3630		3220
3670		0
4280		1530
5840		664
2880		0
1810		3320
2950		2000
1900		0
8360		731
4160		299
1340		1800
1850		893
3740		472
5370		762
1760		2360
2550		0
4270		0
4270		1310
2720		3870
3330		0
4730		574
4930		462
4240		1400
4700		0
0
1910
2760
2300
2640
3160
3760
3590
0
849
1560
1370
1800
3550
1710
1370
4100
850
603
1640
1810
4880
5130
727
1120
1590
5120
0
